# Supplementary material for: Improving Oral Health with Fluoride-Free Calcium-Phosphate-Based Biomimetic Toothpastes: An Update of the Clinical Evidence
Source: MDPI journal article supplement (doi:10.3390/biomimetics8040331), 2023-07-27
Supplement: s1 [file s1]

**Table S1.** Search results using designated search terms

| Search terms                                                                                                        | Database                                             | "hydroxyapatite", or "nano-hydroxyapatite" or "hydroxylapatite" | "ACP" or "Amorphous Calcium Phosphate" or "CPP-ACP" | "Calcium sodium phosphosilicate" or "CSPS" or "Bioglass" or "Novamin" | "beta-tricalcium phosphate" or "β-TCP" or "tricalcium phosphate" or "TCP" | Totals                              |
|---------------------------------------------------------------------------------------------------------------------|------------------------------------------------------|-----------------------------------------------------------------|-----------------------------------------------------|-----------------------------------------------------------------------|---------------------------------------------------------------------------|-------------------------------------|
| + Vehicle:<br>"toothpaste" or<br>"dentifrice"                                                                       | PubMed<br>Scopus<br>Web of science<br>Google Scholar | 625<br>1155<br>213<br>21,921                                    | 677<br>478<br>120<br>11,720                         | 312<br>296<br>103<br>6426                                             | 134<br>170<br>33<br>10,088                                                | 1748<br>2099<br>469<br>not included |
| + Experimental:<br>"In vivo" or "In situ" or<br>"clinical trial" or "Clinical study" or "Randomized clinical trial" | PubMed<br>Scopus<br>Web of science<br>Google Scholar | 71<br>448<br>64<br>6440                                         | 122<br>294<br>60<br>257                             | 31<br>165<br>64<br>2279                                               | 19<br>83<br>17<br>4500                                                    | 243<br>990<br>205<br>not included   |
| + Outcome (Remineralization)<br>"caries" or "white spot lesion" or "WSL",<br>"remineralization",<br>"erosion"       | PubMed<br>Scopus<br>Web of science<br>Google Scholar | 315<br>46<br>40<br>13,660                                       | 108<br>66<br>57<br>5200                             | 7<br>9<br>26<br>2860                                                  | 12<br>15<br>15<br>2341                                                    | 442<br>136<br>138<br>not included   |
| + Outcome (Dentin Hypersensitivity):<br>"sensitivity" or<br>"hypersensitivity"                                      | PubMed<br>Scopus<br>Web of science<br>Google Scholar | 26<br>239<br>22<br>5470                                         | 41<br>62<br>3<br>2038                               | 91<br>146<br>49<br>2656                                               | 3<br>22<br>0<br>1778                                                      | 161<br>469<br>74<br>not included    |
| + Outcome (Whitens):<br>"whiten" or "whitens" or<br>"whitening"                                                     | PubMed<br>Scopus<br>Web of science<br>Google Scholar | 64<br>87<br>4<br>4505                                           | 12<br>23<br>0<br>5328                               | 8<br>12<br>3<br>2514                                                  | 3<br>4<br>1<br>1204                                                       | 87<br>126<br>8<br>not included      |
| + Outcome (Gingival health): "gingival" or<br>"gingivitis" or<br>"periodontal" or<br>"periodontitis"                | PubMed<br>Scopus<br>Web of science<br>Google Scholar | 44<br>213<br>9<br>35,400                                        | 34<br>52<br>2<br>21,000                             | 61<br>84<br>10<br>8332                                                | 10<br>20<br>1<br>8643                                                     | 149<br>369<br>22<br>not included    |
